# Supplementary material for: Synthesis and warm-white LED applications of an efficient narrow-band red emitting phosphor, Rb2ZrF6:Mn4+
Source: Royal Society of Chemistry journal article supplement (doi:10.1039/c7tc02196h), 2017-01-01
Supplement: c7tc02196h1.pdf [file c7tc02196h1.pdf]

## Synthesis and warm-white LED applications of efficient narrow-band red emitting phosphor $\text{Rb}_2\text{ZrF}_6:\text{Mn}^{4+}$

L. Y. Wang, E. H. Song, Y. Y. Zhou, T. T. Deng, S. Ye, and Q. Y. Zhang\*

*State Key Laboratory of Luminescent Materials and Devices, South China University of  
Technology, Guangzhou 510641, China*

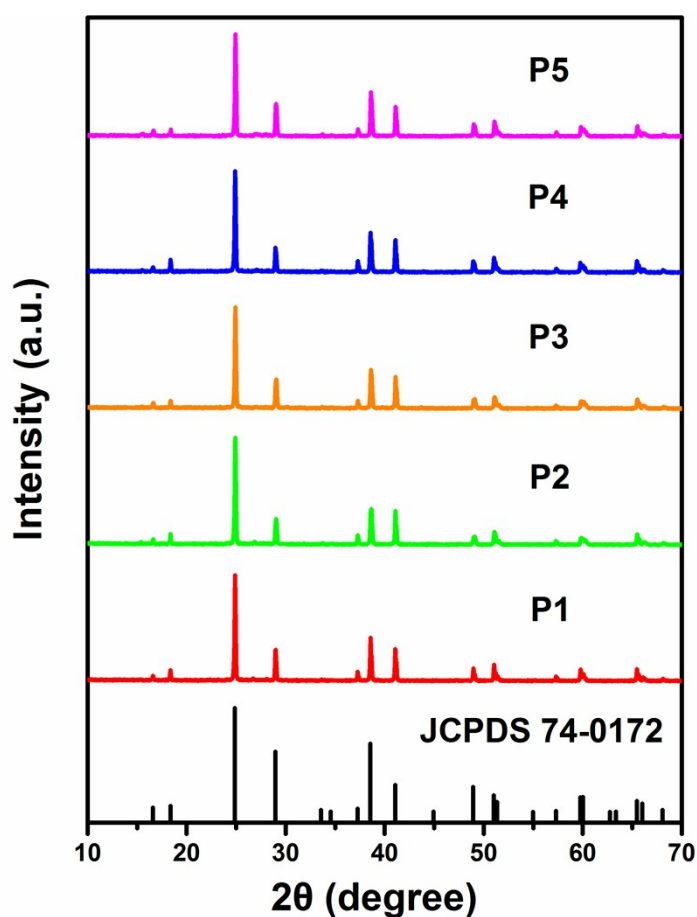

**Fig. S1.** XRD patterns of  $\text{Rb}_2\text{ZrF}_6:\text{Mn}^{4+}$  phosphors doped with different  $\text{Mn}^{4+}$  concentration.

<sup>\*)</sup> Author to whom correspondence should be addressed; Email: [qyzhang@scut.edu.cn](mailto:qyzhang@scut.edu.cn)

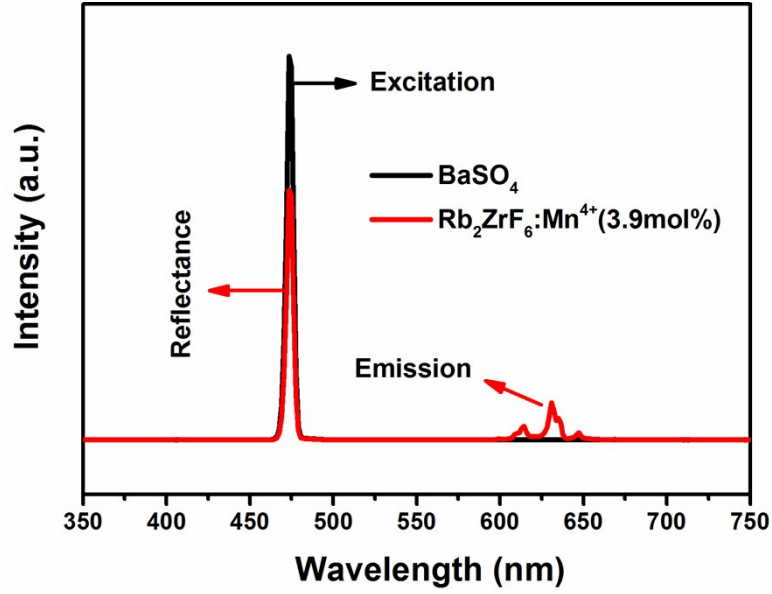

**Fig. S2.** Excitation spectra of BaSO<sub>4</sub>, reflectance and emission spectra of Rb<sub>2</sub>ZrF<sub>6</sub>:Mn<sup>4+</sup> (3.9 mol.%). The quantum efficiency (QE) was calculated as follows:

$$QE = \frac{\int \lambda \cdot P(\lambda) d\lambda}{\int \lambda \{E(\lambda) - R(\lambda)\} d\lambda} \quad (1)$$

where  $E(\lambda)/h\nu$ ,  $R(\lambda)/h\nu$  and  $P(\lambda)/h\nu$  are the number of photons in the spectrum of excitation, reflectance and emission of the phosphor, respectively. All of spectra were recorded by an optical integrating sphere coupled to the QE-2100 spectrophotometer from Otsuka Photo Electronics at room temperature.

#### Eq. S1

$$\Delta E = \sqrt{(u'_t - u'_0)^2 + (v'_t - v'_0)^2 + (w'_t - w'_0)^2}$$

where  $u' = 4x/(3 - 2x + 12y)$ ,  $v' = 9y/(3 - 2x + 12y)$ , and  $w' = 1 - u' - v'$ .  $x$  and  $y$  are the chromaticity coordinates in CIE 1931, 0 and  $t$  are the chromaticity shift at 20 °C and a given temperature, respectively.  $u'$  and  $v'$  are the chromaticity coordinates in  $u' v' w'$  uniform color space.
